# Supplementary material for: Colocalization and Interaction Study of Neuronal JNK3, JIP1, and β-Arrestin2 Together with PSD95
Source: MDPI journal article supplement (doi:10.3390/ijms23084113), 2022-04-08
Supplement: s1 [file s1]

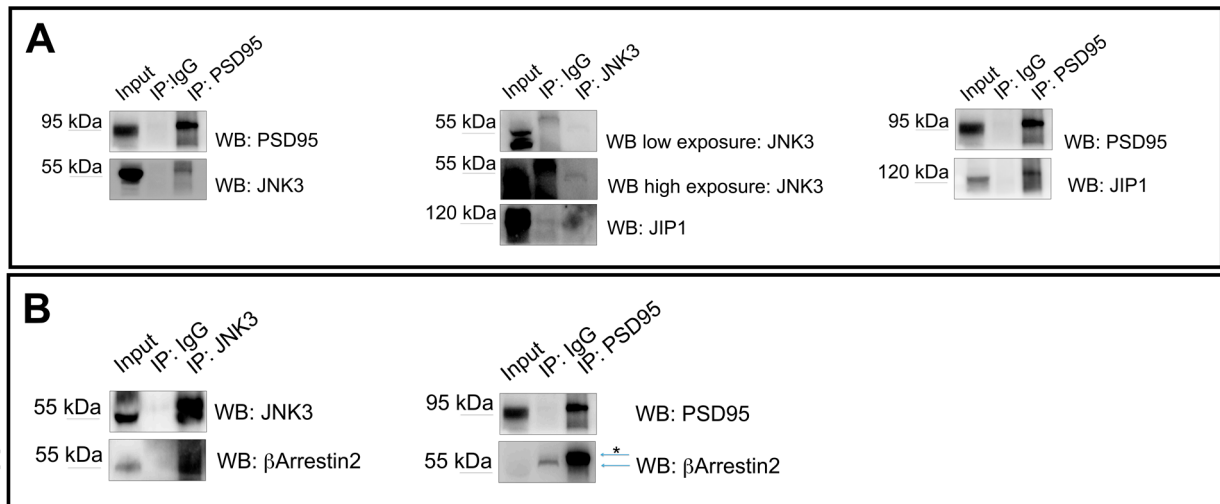

**Supplementary Figure S1. Immunoprecipitations to assess JNK3-JIP1/ $\beta$ -arrestin2-PSD95 colocalization in the whole brain homogenate.** (A) PSD95 was immunoprecipitated from the whole mice brain homogenate using PSD95-specific antibody, separated by SDS-PAGE and analyzed with Western Blot with anti-PSD95, anti-JNK3 (Rabbit), and anti-JIP1 antibody. Immunoprecipitation with IgG antibody was used as a control. JNK3 was immunoprecipitated using JNK3 antibody, and immune complexes were analyzed for the presence of JIP1 and JNK3 (Mouse). Immunoprecipitation with IgG antibody was used as a control. (B) PSD95 was immunoprecipitated from whole mice brain homogenate using PSD95-specific antibody, separated by SDS-PAGE and analyzed with Western Blot with anti-PSD95 and anti- $\beta$ -arrestin2 antibody. Immunoprecipitation with IgG antibody was used as a control. JNK3 was immunoprecipitated using JNK3 antibody, and immune complexes were analyzed for the presence of  $\beta$ -arrestin2 and JNK3 (rabbit). Immunoprecipitation with IgG antibody was used as a control. \* Indicates non-specific bands.
